# Supplementary figures and images for: Sonochemical synthesis of tungsten sulfide nanorodsElectronic supplementary information (ESI) available: TGA curve for the as-prepared product; AFM image of WS2 packs of nanorods. See http://www.rsc.org/suppdata/jm/b1/b110867k/
Source: Royal Society of Chemistry journal article supplement (doi:10.1039/b110867k), 2002-04-02

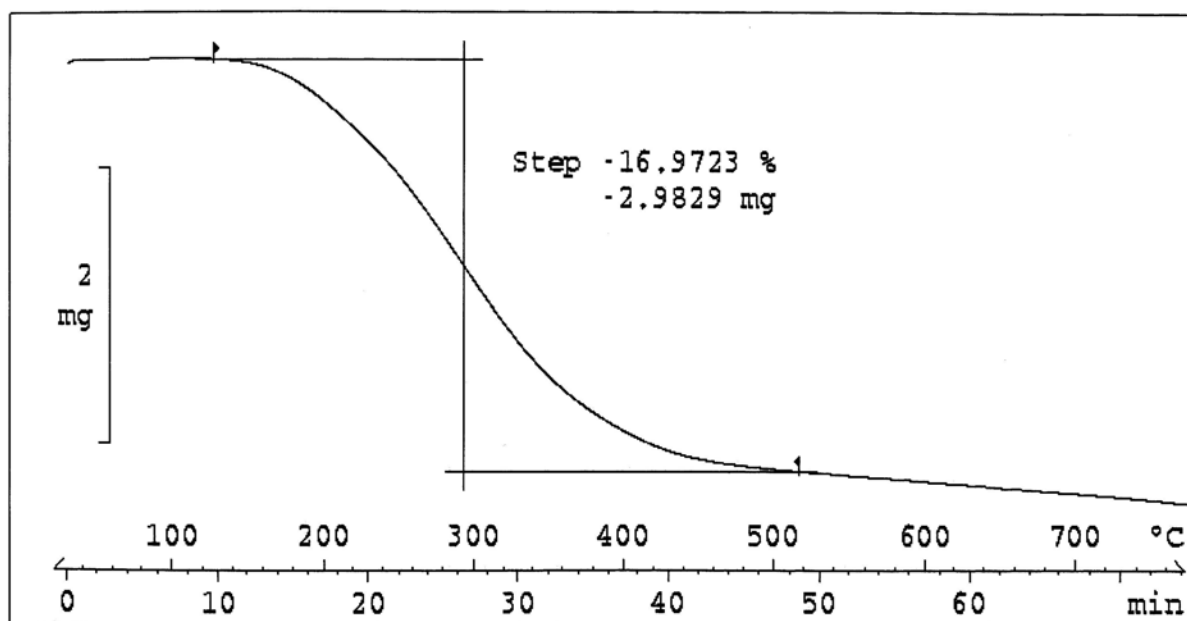

Figure 1

Supplement: b110867k1.pdf [file b110867k1.pdf]
